## Frontolimbic brain volume abnormalities in bipolar disorder with suicide attempts

**Mbemba Jabbi<sup>a,b,c,d,\*</sup>; Wade Weber<sup>a,b</sup>; Jeffrey Welge<sup>c</sup>; Fabiano Nery<sup>e</sup>; Maxwell Tallman<sup>c</sup>; Austin Gable<sup>e</sup>; David E. Fleck<sup>e</sup>; Elizabeth T.C. Lippard<sup>a,b,c,d</sup>; Melissa DelBello<sup>e</sup>; Caleb Adler<sup>e</sup>; Stephen M. Strakowski<sup>a,b,d\*</sup>**

\*Correspondence: Mbemba Jabbi, [mbemba.jabbi@austin.utexss.edu](mailto:mbemba.jabbi@austin.utexss.edu); Stephen M. Strakowski, [steve.strakowski@austin.utexas.edu](mailto:steve.strakowski@austin.utexas.edu)

<sup>a</sup>Department of Psychiatry, Dell Medical School, the University of Texas at Austin

<sup>b</sup>The Mulva Clinic for the Neurosciences, Dell Medical School, the University of Texas at Austin

<sup>c</sup>Institute of Neuroscience, the University of Texas at Austin

<sup>d</sup>Department of Psychology, the University of Texas at Austin

<sup>e</sup>Department of Psychiatry and Behavioral Neuroscience, University of Cincinnati College of Medicine, Cincinnati, OH.

Key Words: Bipolar I Disorder, Mood Status, Suicide Attempt, Gray Matter Volume, Brain, Behavior

## **ABSTRACT.**

Over 2.3 million people in the United States live with bipolar disorder. Sixty percent of those with a bipolar disorder diagnosis attempt suicide at least once in their lifetime, and up to 19% die by suicide. However, the neurobiology of suicide attempts in bipolar disorder remains unclear. Here, we studied the neuroanatomical basis for suicide attempt history in bipolar disorder by measuring gray matter volumes (GMV) to identify differences in brain-volumes in 121 participants with bipolar disorder type I, and healthy participants (n=40). The bipolar group consisted of individuals with suicide attempt history (n=23) and no suicide attempt history (n=58). All participants completed behavioral/diagnostic assessments and MRI measures of GMV. We focused on a predefined frontolimbic circuitry in bipolar disorder versus (vs.) healthy to first identify diagnostic GMV markers and to specifically identify markers for suicide attempt history. We found reduced GMV markers for bipolar diagnosis (i.e., bipolar<healthy) in the anterior cingulate cortex (ACC), and dorsolateral prefrontal cortices (DLPFC). Our observed frontolimbic GMV abnormalities were associated with suicide attempt history and measures of individual variations in current suicidal ideation at the time of scanning. These results identified a frontolimbic-GMV marker for bipolar diagnosis and suicidal behavioral risk tendencies.

## **Highlights.**

Suicide is a major health problem especially in bipolar disorder but the neurobiological basis for suicide attempts remains obscure. We identified an anterior cingulate and dorsolateral prefrontal cortical volume correlate for suicide attempt history and suicidal ideation and thereby demonstrates a convergent brain marker for suicidal behaviors.

## INTRODUCTION

Suicide attempts are highly prevalent in mood disorders in general (Kessler et al. 2005; Murray et al. 2012; [AFSP.org](#); [NIMH.gov](#); [CDC.gov](#)) and bipolar disorder in particular (Dilsaver et al. 1994; Chen & Dilsaver 1996). Up to 60% of individuals with a bipolar disorder diagnosis attempt suicide at least once in their lifetime (Dilsaver et al. 1994; Chen & Dilsaver 1996; Novick et al. 2010) and 10-15% of individuals with bipolar disorder die by suicide (Bostwick & Pankratz 2000). Despite that suicidal behaviors represent a significant public health problem, the neuroanatomical abnormalities underlying suicide attempt history (Bostwick & Pankratz 2000; Schmaal et al. 2020) and suicidal ideation in bipolar disorder are not well defined.

The frontolimbic network consisting of the anterior insula, dorsal anterior cingulate cortex (d-ACC), subgenual/ventral anterior cingulate cortex (vACC), and medial, orbitofrontal, and dorsolateral prefrontal cortices (DLPFC) are collectively critical for perceptual, mnemonic, experiential, and interoceptive aspects of affective processes (Dolan 2002; Damasio 2003; Critchley et al. 2004; Feinstein et al. 2006; Jabbi et al. 2008; Craig 2009). The ventral-to-dorsal extension of this frontolimbic circuitry starting from anterior insula to the ACC and prefrontal cortex is implicated in regulating the integration of *interoceptive* (i.e., inner bodily feeling states) (Critchley et al. 2004; Craig et al. 2009; Joyce & Barbas et al. 2018) with *exteroceptive* (i.e., outer bodily percepts) (Nauta 1971; Goldman-Rakic 1988) sensory domains during affective processing and response. The integrity of this frontolimbic circuitry is suggested to contribute to the experience and maintenance of mood states (Khalsa et al. 2018) and suicidal behaviors (Wagner et al. 2012; Mathews et al. 2013; Oquendo et al. 2014; Lutz et al. 2017).

A preponderance of evidence points to a reduction in structural magnetic resonance imaging (MRI) voxel-based morphometry (VBM) measures of frontolimbic GMV in suicidal

behavior in mood disorders (Eckman et al. 2010; Benedetti et al. 2011; Singh et al. 2012; Lijfijt et al. 2014; Huber et al. 2019; Fan et al. 2019; Lippard et al. 2019; Johnston et al. 2019; Schmaal et al. 2020). In bipolar I disorder in particular, frontolimbic GMV reductions in adults with a history of suicide attempts (Benedetti et al. 2011; Gosnell et al. 2016; Schmaal et al. 2020) have been shown to be associated with the lethality of the attempts (Duarte et al. 2017). However, the relationship between these frontolimbic GMV neuroanatomical abnormalities with suicide attempt history and more current suicidal ideations in bipolar disorder remains obscure. Lack of a better understanding of the neuroanatomical basis for suicidal behaviors impedes more anatomical understanding of brain abnormalities underlying suicidal behaviors. In this study, we specifically examined the neuroanatomical basis in terms of GMV correlates for suicide attempt history and active suicidal ideation in bipolar disorder.

Based on prior imaging evidence, we tested the hypothesis that frontolimbic GMV diagnostic markers for bipolar I disorder vs. healthy participants would show greater abnormalities in bipolar suicide attempt history relative to no history of suicide attempt. We further evaluated if the neurobiological correlates for suicide attempt history would be associated with more acute suicidal ideation scores during brain imaging.

## **METHODS**

**Participants:** All participants in this analysis completed behavioral, diagnostic, and structural MRI procedures following the design of the completed Bipolar Imaging and Treatment Research Center (BITREC) study of the University of Cincinnati; details of inclusion and exclusion criteria are available in previous reports (Borgelt et al. 2018; Fleck et al. 2019; Nery et al. 2019). One hundred and twenty-one participants completed the structural MRI study, of which 42 were

unmedicated bipolar I manic (11 with suicide attempt history), 39 unmedicated bipolar I depressed participants (12 with suicide attempt history), and 40 healthy comparison participants (see **Table 1** for demographic details and specific mood state as well as suicidal ideation ratings). For this analysis, we combined the mood states based on the assumption that neuroanatomy would minimally change in different phases of illness. All adult participants consented (and all minor participants completed parental consent and assents) to voluntarily participate in the study with the option to withdraw at any time of their choosing. All participants received compensation for participating in the study and protocol was approved by the University of Cincinnati IRB.

**Behavioral Analysis:** Demographics (sex and age), behavioral, diagnostic measures assessing IQ, bipolar I mood episode status of depression vs. mania, and individual ratings of mania, as measured with the young mania rating scales (YMRS) (Young et al. 2000), and depression, as measured with the Hamilton depression rating scale (HAM-D) (Hamilton 1960), were obtained at the time of scanning. Suicide attempt history was also assessed before MRI measurements.

**Suicide Attempt Assessments:** Data on participant suicide attempt status were retrieved from diagnostic interview records. Specifically, scores were extracted from the Washington University Kiddie Schedule for Affective Disorders and Schizophrenia (WASH-U KSADS) for participants younger than the age of 18 years (Kaufman et al. 2004); and the Structured Clinical Interview for DSM-IV (SCID) (DSM IV 1994) for adults. From these interviews, the presence of a suicide attempt history was extracted from interviewer notes. All healthy participants were free of any mental illness or suicidal behaviors. Additionally, the current and past Major Depressive Episode sections, which provide prompts to probe for suicidality, contained additional information for

participants who responded with previous/current suicidal ideation or attempts. To specifically assess suicidal ideation, we used the HAM-D suicidal ideation item scores.

### **Image Acquisition and Preprocessing**

**Anatomical Image Acquisition:** All scans were performed on a 4 Tesla Varian Unity INOVA Whole Body MRI/MRS system (Varian Inc., Palo Alto, CA, USA) at the University of Cincinnati's Center for Imaging Research. High-resolution, T1-weighted, 3-D neuroanatomic scans were acquired using a modified driven equilibrium Fourier transform (MDEFT) pulse sequence (TMD = 1.1 s, TR/TE = 13/6 ms, flip angle = 22°, FOV = 256 x 192 x 192 mm, matrix 256 x 192 x 96 pixels) as previously described (Lee et al., 2012).

**Anatomical Image Preprocessing:** The anatomical scans were processed using the Computational Anatomy Toolbox (CAT12) and the Statistical Parametric Mapping (SPM12) software. First, the scans were segmented according to tissue type (i.e., gray matter, white matter, cerebrospinal fluid, etc.), and then normalized using the Montreal Neurological Institute's MNI152 template. During the segmentation process, CAT12 also corrects for signal bias, noise, and global intensities. The segmented anatomical scan files were inspected for quality assurance, and intracranial volume was extracted from the data. The data were then smoothed with a Gaussian kernel of 8 mm full width at half maximum.

### **Analyses of Extracted Frontolimbic Region of Interest (ROI) GMV Differences**

The frontolimbic regions of interest (ROI) consist of the anterior insula, dACC, vACC, and DLPFC, which were defined using ITK Snap software on a standardized (in MNI space)

anatomical brain template (<http://www.itksnap.org/pmwiki/pmwiki.php>). For each region, the anatomical boundary was demarcated in 3-dimensional space (see **Figure 1A-D**).

We then used Marsbar release version .44 to first import individually defined frontolimbic ROIs from a cluster image (nifti) and extracted GMV values from each ROI separately for each participant from the raw GMV values in native space (<http://marsbar.sourceforge.net/>). Because the participants include those below and above 18 years of age, age and total intracranial volume (TIV) were both included in a T-test as covariates when group differences were assessed in GMV (bipolar I vs. healthy) for each frontolimbic ROI to identify GMV group markers. TIV and age were also included in a separate full factorial ANOVA as covariates in the model assessing suicide history-related differences in GMV markers (i.e., bipolar participants with suicide attempt history vs. bipolar participants with no suicide attempt history).

### **Analyses of Frontolimbic-brain circuitry VBM of GMV Differences**

Because the frontolimbic ROI approach was based strictly on anatomically defined regional boundaries that do not take into account the localized nature of GMV differences in specific sub-regions of the targeted frontolimbic circuitry, we additionally performed *posthoc* frontolimbic-wide GMV measures using voxel-based morphometry (VBM) in the Statistical Parametric Mapping (SPM12) software (<https://www.fil.ion.ucl.ac.uk/spm/software/spm12/>). As in the anatomical frontolimbic ROI analysis, TIV and age were included in a voxelwise T-test as covariates when group differences in GMV (bipolar I vs. healthy) were assessed in SPM12 to identify diagnostic markers. To this aim, we first evaluated the GMV differences between healthy participants (n = 40) and the entire bipolar disorder group (n = 81) to identify regional

gray matter reductions associated with a bipolar I disorder diagnosis using a 2-sample T-test. We defined second-level contrasts derived from a random-effects analysis comparing healthy > bipolar GMV measures and bipolar > healthy groups at  $p < 0.001$  uncorrected.

For our primary analysis, we included TIV and age in a frontolimbic circuitry voxelwise full-factorial ANOVA as covariates to assess GMV correlates for suicide attempt history (i.e., bipolar participants with suicide attempt history vs. bipolar participants without suicide attempt history). We adopted a similar approach our post-hoc analysis of GMV correlates for suicidal ideation scores by including individual-level scores on current suicidal ideation in a factorial model included depressed and manic bipolar participants with suicide attempt history and without suicide attempt history in SPM12. Contrasts of main effects of suicide attempt history across bipolar participants, as well as the main effect of suicide attempt history in relationship with current suicidal ideation scores, were examined separately in SPM12 at  $p < 0.001$ , uncorrected a frontolimbic mask (Supplementary **Figure 1**) was used for visualization of results.

## RESULTS

### General Linear Model (GLM) of Behavioral and Diagnostic/Mood Ratings

Sex and age distributions did not differ between bipolar I and healthy groups ( $F_{1,119} = 1.88$ ;  $p=0.17$ ). As expected, all mood ratings (HAM-D, YMRS, and the HAM-D item-11 suicidal ideation rating) were higher in the bipolar I group compared to the healthy comparison group ( $F_{1,117} < 10$ ,  $p < 0.001$ ). Within bipolar I, HAM-D item-11 suicidal ideation ratings were not significantly different between groups ( $F_{1,80} = 1.50$ ;  $p = 0.221$ ). By definition, overall HAM-D ratings of depressed mood were higher in the depressed than the manic group ( $F_{1,80} = 46.76$ ;



$p=0.0001$ ), while YMRS ratings of manic mood were higher in the manic than the depressed group ( $F_{1,80} = 25.50$ ;  $p = 0.0001$ ).

### **GLM of Extracted Frontolimbic Region of Interest (ROI) GMV Measures**

Including total intracranial volume (TIV) and age as covariates, frontolimbic ROI extractions of GMV values were found to be selectively reduced in bipolar I vs. healthy comparison groups only in the vACC ( $F_{1,116} = 7.37$ ;  $p = 0.008$ ) (**Figure 1A**), but not in any other ROI (**Table 2A**).

Including TIV and age as covariates for the within bipolar I group ANOVA comparisons with suicide attempt history (i.e., a record of a prior suicide attempt vs. no previous suicide attempt history), ROI extractions of GMV values found a *main effect of suicide attempt history* in that the GMV measures in vACC which was identified as a marker for bipolar diagnosis, was significantly different in bipolar participants with a suicide attempt history vs. those without suicide attempt history ( $F_{1,75} = 4.09$ ;  $p = 0.047$ ) (**Figure 1A**). Specifically, within the targeted vACC ROI showing reduced GMV in bipolar relative to healthy, the bipolar participants without suicide attempt history showed a more pronounced reduction in GMV volume relative to those with suicide attempt history. No other targeted ROIs (i.e., anterior insula, dACC, and DLPFC) showed diagnostic or suicide attempt history-related differences in GMV. (**Table 2B**). ROI extraction values did not show any significant correlations with HAM-D item-11 suicidal ideation scores across all regions.

### **Voxelwise Frontolimbic Circuitry GMV Differences Between Bipolar vs. Healthy VBM**

To first assess if measures of reduction in GMV within the anatomically defined frontolimbic ROIs might be more sub-regionally localized in relation to diagnostic group differences between

bipolar I and healthy participants, we included TIV and age as covariates in a whole-brain VBM 2-sample T-test comparison of GMV values. We found localized reductions of vACC/orbitofrontal cortex, and bilateral DLPFC volumes (at  $p < 0.001$  uncorrected, **Figure 2; Table 3A**) in bipolar I vs. healthy participants as markers for a bipolar diagnosis.

### **Factorial ANOVA VBM Across Bipolar Suicide Attempt vs. Non-Attempt History**

To further assess if measures of reduction in GMV within the anatomically defined frontolimbic ROIs might be more sub-regionally localized in relation to suicide attempt status, we conducted a full factorial ANOVA in the two bipolar I groups with and without a history of suicide attempt (excluding controls). We *first* assessed suicide attempt history (i.e., a record of prior suicide attempt vs. no suicide attempt history) at the whole-frontolimbic/voxelwise level. We found the main effect of suicide attempt history in GMV to be in the vACC and rostral ACC/ventromedial prefrontal cortex and DLPFC GMV that was more prominent in those without suicide attempt history compared with those with a suicide attempt history at  $p < 0.001$  uncorrected (**Figure 3A; Table 3B**). In line with the ROI analysis, the DLPFC GMV in the bipolar participants without suicide attempt history was more reduced relative to those with suicide attempt history.

Further assessment of the relationship between GMV measures and current suicidal ideation scores revealed that the observed individual variation in DLPFC GMV within the bipolar participants with suicide attempt history was positively correlated with HAMD-suicidal ideation scores (at  $r = .47$ ). The relationship was negative, albeit insignificant between DLPFC GMV and suicidal ideation scores in bipolar individuals without a history of suicide attempt (at  $r = -.26$ ) using the Pearson's correlation in SPM12 at  $p < 0.001$  (**Figure 3B; Table 3C**).

## DISCUSSION

In this report, we tested the hypothesis that frontolimbic circuit anatomy would be altered in bipolar I disorder compared with healthy participants, and that these GMV differences would be associated with a history of suicide attempt.

We found that ACC and DLPFC regions known to be involved in integrating affective, inhibitory, and intero- and exteroceptive systems (Nauta 1971; Goldman-Rakic 1988; Critchley et al. 2004; Craig et al. 2009; Joyce & Barbas et al. 2018), which are relevant for high-level controls of affective including suicidal behavior, were reduced in volume in bipolar I disorder relative to a healthy comparison group. This bipolar GMV marker was most importantly observed to be more reduced in bipolar participants without a history of suicide attempts compared to those with a suicide attempt history.

Here, frontolimbic GMV was found to be more reduced in the targeted vACC ROI in bipolar disorder relative to healthy participants. This reduced vACC regional volume further exhibited differential GMV measures in bipolar participants with a history of a suicide attempt from those without a suicide attempt history. This localized frontolimbic DLPFC finding was in line with vACC ROI findings, and more importantly, our DLPFC measures of GMV differences associated with suicide attempt history. The results further showed that individual variations in this localized DLPFC volume better predicted suicidal ideation in those with a history of suicide attempt than those without suicide attempt history, and underscores the relevance of these anatomical regions in the inhibitory control of harmful thoughts and actions during severe crisis (Schmaal et al. 2020). Taken together, our frontolimbic GMV bipolar diagnostic and suicide attempt history-related findings support a possible underlying frontolimbic mechanism that likely governs adaptive and mal-adaptive excitatory/inhibitory balances in affective regulatory states

(Joyce & Barbas 2018). Our results offer a potential window into the localized neuroanatomical repercussions for mood morbidity and suicide mortality. They suggest that the neuroanatomy for suicide attempts and ideation are likely more closely related than previously thought.

Several aspects of our findings deserve comment. *First*, suicide attempt history was not different between the bipolar depressed and manic cohorts. *Second*, the number of bipolar patients with suicide attempt histories was lower than those without suicide attempt history. As such, our multiple testing of a smaller sample with suicide attempt history can lead to medium-to-large effect sizes that could be inflated, especially in the whole-frontolimbic analysis that reflects highly localized GMV reductions related to suicidal behaviors.

*Third*, we cannot disentangle the role of age of disease onset, approximate/average duration of bipolar illness across the two episodic mood cohorts of depressed and manic states, medication history (they were all medication naïve at the time of scanning), and substance/alcohol use diagnostic or abuse status, and as such, not assessing the effects of these variables on GMV change between episodic mood states and suicidal behavior is a limitation that needs to be more specifically addressed and if possible analyzed by future studies. *Fourth*, the observed neurobiological phenotype in terms of vACC and DLPFC GMV associated with suicide attempt history reported here may be more proximal to mood states because the participants in the depressed and manic cohorts were independent groups (individuals in the manic cohort were not included in the depressed cohort). This idea is consistent with our overall objective of using structural brain imaging measures — which are subservient to functional brain measures — to identify the underlying neuroanatomical mechanisms for suicide attempt risk across bipolar depressed and manic states, especially given the disproportionate number of suicides in bipolar disorder relative to other mental illnesses.

Our observation that frontolimbic GMV abnormalities are a marker for bipolar diagnosis and suicide attempt history can only be based on the presence of suicide attempt history since the frequency of suicide attempt were not specifically analyzed continuously over time in the current study. Future studies using longitudinal approaches aimed at extending and replicating our findings by accounting for the number of prior suicide attempts across depressed and manic mood episodes documented over time in larger samples of the same individuals, and age span, will shed important light on the neuroanatomical changes driving suicidal behavioral risks.

In summary, our results underscore the anatomically relevant status of the targeted frontolimbic network's structure (Hebb 1949; Nauta 1971; Goldman-Rakic 1988; Critchley et al. 2003; Damasio 2003; Jabbi et al. 2008; Craig 2009; Singer et al. 2009; Joyce & Barbas 2018) in the maintenance of affective states, including mood dysfunctions (Savitz & Drevets 2009; Goodkind et al. 2015; Wise et al. 2016) and their possible impacts on suicidal behavior. The observed frontolimbic GMV perturbations in terms of the most reduced volumes being present in bipolar participants, and that these reduced GMV locales were significantly different between bipolar individuals with a suicide attempt history and those without a history of suicide attempt is a striking demonstration of how neural systems serve to modulate the rupture of adaptive mood states which can increase suicidal behavioral risk tendencies. If replicated in independent cohorts, these findings demonstrated neuroanatomical circuitry abnormalities in terms of frontolimbic GMV measures associated with bipolar suicide attempt history and current suicidal ideation. This line of research may inform regional definition of molecular mechanistic biomarkers that can be used to advance novel mood disorder and suicide neurotherapeutics.

**Funding:** This research is funded by R01MH080973

**Disclosures.**

M. Jabbi: None

W. Weber: None

J. Welge: None

F. Nery: Dr. Nery's spouse is an employee of Eli Lilly & Co.

D. Fleck: None

A. Gable: None

M. Tallman: None

E. Lippard: None

M. DellBello: Dr. DelBello receives research support from NIH, PCORI, Acadia, Allergan, Janssen, Johnson and Johnson, Lundbeck, Otsuka, Pfizer, and Sunovion. She has also served as a consultant, on the advisory board, or has received honoraria for speaking for Alkermes, Allergan, Assurex, CMEology, Janssen, Johnson and Johnson, Lundbeck, Myriad, Neuronetics, Otsuka, Pfizer, Sunovion, and Supernus.

C. Adler: None

S. Strakowski: Dr. Strakowski chairs DSMBs for Sunovion as a Consultant, and has research grants with Janssen pharmaceuticals and Alkermes.

## REFERENCES

<https://afsp.org/about-suicide/suicide-statistics/>

<https://www.nimh.nih.gov/health/statistics/suicide.shtml>

<https://www.cdc.gov/injury/wisqars/leadingcauses.html>

Benedetti F (2011). Opposite effects of suicidality and lithium on gray matter volumes in bipolar depression. *J Affect Disord.* 135(1-3):139-47.

Borgelt L et al. (2019). Neurophysiological effects of multiple mood episodes in bipolar disorder. *Bipolar Disord.* 21(6):503-513.

Bostwick JM, Pankratz VS (2000). Affective disorders and suicide risk: a reexamination. *Am J Psychiatry.* 157(12):1925-32.

Chen YW, Dilsaver SC (1996). Lifetime rates of suicide attempts among subjects with bipolar and unipolar disorders relative to subjects with other Axis I disorders. *Biol Psychiatry.* 39(10):896-9.

Craig AD (2009). How do you feel—now? The anterior insula and human awareness. *Nat Rev Neurosci* 10:59–70.

Critchley HD et al. (2004) Neural systems supporting interoceptive awareness. *Nat Neurosci* 7:189–195.

Damasio A (2003). Feelings of emotion and the self. *Ann N Y Acad Sci* 1001:253–261.

Diagnostic And Statistical Manual of Mental Disorders : DSM-IV. Washington, DC : American Psychiatric Association, 1994.

Dilsaver SC et al. (1994). Suicidality in patients with pure and depressive mania. *Am J Psychiatry.* 151(9):1312-5.

Dolan, R. J. (2002). Neuroscience and psychology: Emotion, cognition, and behavior. *Science.* 298: 1191-4.

Fan S et al. (2019). Gray and white matter differences in adolescents and young adults with prior suicide attempts across bipolar and major depressive disorders. *J Affect Disord.* 245: 1089-1097.

Fleck DE et al. (2018). Factor analysis of regional brain activation in bipolar and healthy individuals reveals a consistent modular structure. *J Affect Disord.* 234:14-19.

- Goldman-Rakic PS (1988). Topography of cognition: parallel distributed networks in primate association cortex. *Annu Rev Neurosci.* 11: 137-56.
- Hawton K et al. (2005). Suicide and attempted suicide in bipolar disorder: a systematic review of risk factors. *J Clin Psychiatry*, 66(6):693-704.
- Hebb D. (1949). *The Organization of Behavior: A Neuropsychological Theory*. J. Wiley & Sons.
- Huber RS et al. (2019). Reduced lateral orbitofrontal cortex volume and suicide behavior in youth with bipolar disorder. *Bipolar Disord.* 21(4):321-329.
- Jabbi M et al. (2008). A common anterior insula representation of disgust observation, experience and imagination shows divergent functional connectivity. *PLoS One.* 3(8):e2939.
- Johnston J et al. (2017). Multimodal Neuroimaging of Frontolimbic Structure and Function Associated With Suicide Attempts in Adolescents and Young Adults With Bipolar Disorder. *Am J Psychiatry.* 174(7): 667-675.
- Joyce MKP, Barbas H (2018). Cortical Connections Position Primate Area 25 as a Keystone for Interoception, Emotion, and Memory. *J Neurosci.* 38(7):1677-1698.
- Khalsa SS et al. (2018). Interoception and Mental Health: A Roadmap. *Biol Psychiatry Cogn Neurosci Neuroimaging.* 3(6):501-513.
- Kessler RC et al. (2005). Prevalence, Severity, and Comorbidity of Twelve-month DSM-IV Disorders in the National Comorbidity Survey Replication (NCS- R). *Archives of General Psychiatry.* 62(6): 617–627.
- Goodkind M et al. (2015). Identification of a common neurobiological substrate for mental illness. *JAMA Psychiatry.* 72: 305–315.
- Hamilton M (1960). A rating scale for depression. *J Neurol Neurosurg Psychiatry.* 23:56–62
- Kaufman, J., & Schweder, A. E. (2004). The Schedule for Affective Disorders and Schizophrenia for School-Age Children: Present and Lifetime version (K-SADS-PL). In M. J. Hilsenroth & D. L. Segal (Eds.) (p. 247–255). John Wiley & Sons, Inc.
- Lee JH et al. (2012). 4-T 7Li 3D MR spectroscopy imaging in the brains of bipolar disorder subjects. *Magn Reson Med.* 68(2): 363-8.
- Lijffijt M et al. (2014). Illness-course modulates suicidality-related prefrontal gray matter reduction in women with bipolar disorder. *Acta Psychiatr Scand.* 130(5):374-87.
- Lippard ETC et al. (2019). Preliminary examination of gray and white matter structure and longitudinal structural changes in frontal systems associated with future suicide attempts in adolescents and young adults with mood disorders. *J Affect Disord.* 245: 1139-1148.



Lutz PE, Mechawar N and Turecki G (2017). Neuropathology of suicide: recent findings and future directions. *Molecular Psychiatry*. 22:1395–1412.

Mathews DC et al. (2013). Neurobiological aspects of suicide and suicide attempts in bipolar disorder. *Transl Neurosci*. 4(2).

Murray CJL et al. (2012). Disability-adjusted life years (DALYs) for 291 diseases and injuries in 21 regions, 1990–2010: a systematic analysis of Global Burden of Disease Study 2010. *The Lancet*. 380: 2197–2223.

Nauta WJ. (1971). The problem of the frontal lobe: a reinterpretation. *J Psychiatr Res*. 8:167-87.

Nery FG et al. (2019). Longitudinal proton spectroscopy study of the prefrontal cortex in youth at risk for bipolar disorder before and after first mood episode. *Bipolar Disord*. 21(4): 330-341.

Novick DM, Swartz HA, Frank E (2010). Suicide attempts in bipolar I and bipolar II disorder: a review and meta-analysis of the evidence. *Bipolar Disord*. 12(1):1-9.

Oquendo MA et al. (2014). Toward a biosignature for suicide. *Am J Psychiatry*. 171:1259-77.

Savitz J & Drevets WC (2009). Bipolar and major depressive disorder: Neuroimaging the developmental-degenerative divide. *Neuroscience and Biobehavioral Reviews*. 33(5): 699-771.

Schmaal L et al. (2020). Imaging suicidal thoughts and behaviors: a comprehensive review of 2 decades of neuroimaging studies. *Mol Psychiatry*. 25(2):408-427.

Seeley WW, et al. (2007). Dissociable intrinsic connectivity networks for salience processing and executive control. *J Neurosci*. 27:2349–2356.

Singh MK et al. (2012). Volumetric reductions in the subgenual anterior cingulate cortex in adolescents with bipolar I disorder. *Bipolar Disord*. 14(6):585-96.

Strakowski SM et al. (1996). Suicidality among patients with mixed and manic bipolar disorder. *Am J Psychiatry*. 153(5):674-6.

Wagner G et al. (2012). Prefrontal cortical thickness in depressed patients with high-risk for suicidal behavior. *J Psychiatr Res*. 46(11): 1449-55.

Wise T et al. (2016). Common and distinct patterns of grey-matter volume alteration in major depression and bipolar disorder: evidence from voxel-based meta-analysis. *Molecular Psychiatry*. 22(10): 1455–1463.

Young RC et al. (2000). Young Mania Rating Scale. In: *Handbook of Psychiatric Measures*. Washington, DC: American Psychiatric Association: 540-542.

**TABLES**

**Table 1**

| <b>TABLE 1</b>                |  | <b>DIAGNOSTIC &amp; BIPOLA MOOD STATE DEMOGRAPHICS</b>     |                      |                  |                       |                       |                                    |
|-------------------------------|--|------------------------------------------------------------|----------------------|------------------|-----------------------|-----------------------|------------------------------------|
|                               |  | <b>HEALTHY - All Useable Scans (one per participant)</b>   |                      |                  |                       |                       |                                    |
|                               |  | <b>N (% of group)</b>                                      | <b>Mean Age (SD)</b> | <b>(Females)</b> | <b>Mean YMRS (SD)</b> | <b>Mean HAMD (SD)</b> | <b>Mean HAMD Suicide Item (SD)</b> |
| <b>Total</b>                  |  | 40 (33.05% study sample)                                   | 22.45 (5.44)         | 21               | 0.58 (1.32)           | 1 (1.88)              | 0 (0)                              |
|                               |  | <b>MANIC - All Useable Scans (one per participant)</b>     |                      |                  |                       |                       |                                    |
|                               |  | <b>N</b>                                                   | <b>Mean Age (SD)</b> | <b>(Females)</b> | <b>Mean YMRS (SD)</b> | <b>Mean HAMD (SD)</b> | <b>Mean HAMD Suicide Item (SD)</b> |
| <b>Total</b>                  |  | 42 (34.7% study sample)                                    | 18.45 (4.68)         | 27               | 24.1 (4.89)           | 15.48 (8.43)          | 0.4 (0.88)                         |
| <b>No SA Attempt in mania</b> |  | 31 (73.8% manic sample)                                    | 19.28 (5.13)         | 19               | 24.39 (4.86)          | 15.16 (8.25)          | 0.35 (0.19)                        |
| <b>SA Attempt</b>             |  | 11 (26.2% manic sample)                                    | 16.1 (1.53)          | 8                | 23.27 (5.12)          | 16.36 (9.28)          | 0.55 (0.82)                        |
|                               |  | <b>DEPRESSED - All Useable Scans (one per participant)</b> |                      |                  |                       |                       |                                    |
|                               |  | <b>N</b>                                                   | <b>Mean Age (SD)</b> | <b>(Females)</b> | <b>Mean YMRS (SD)</b> | <b>Mean HAMD (SD)</b> | <b>Mean HAMD Suicide Item (SD)</b> |
| <b>Total</b>                  |  | 39 (32.23% study sample)                                   | 23.43 (5.59)         | 26               | 13 (6.50)             | 27.54 (8.47)          | 0.62 (.935)                        |
| <b>No SA Attempt</b>          |  | 27 (69.2% depressed sample)                                | 23.13 (5.02)         | 17               | 12 (5.94)             | 25.81 (8.67)          | 0.52 (0.89)                        |
| <b>SA Attempt</b>             |  | 12 (30.8% depressed sample)                                | 24.1 (6.89)          | 9                | 13 (7.87)             | 31.42 (6.81)          | 0.83 (1.02)                        |

**Table 2**

| <b>Table 2A, ROI ANOVA, Healthy &gt; Bipolar Disorder</b> |          |                  |                           |
|-----------------------------------------------------------|----------|------------------|---------------------------|
| <b>ROI</b>                                                | <b>F</b> | <b>Cohen's d</b> | <b>p<sub>uncorr</sub></b> |
| vACC                                                      | 7.37     | 0.49             | 0.008                     |
| dACC                                                      | 1.96     | 0.25             | 0.16                      |
| left-Anterior Insula                                      | 0.66     | 0.14             | 0.42                      |
| right-Anterior Insula                                     | 0.62     | 0.14             | 0.43                      |
| left-DLPFC                                                | 0.46     | 0.12             | 0.50                      |
| right-DLPFC                                               | 1.84     | 0.24             | 0.18                      |

  

| <b>Table 2B, ROI ANOVA, Main Effect of Suicide Attempt</b> |          |                  |                           |
|------------------------------------------------------------|----------|------------------|---------------------------|
| <b>ROI</b>                                                 | <b>F</b> | <b>Cohen's d</b> | <b>p<sub>uncorr</sub></b> |
| vACC                                                       | 74.09    | 1.91             | 0.047                     |
| dACC                                                       | 3.5      | 0.41             | 0.06                      |
| left-Anterior Insula                                       | 0.07     | 0.05             | 0.78                      |
| right-Anterior Insula                                      | 2.43     | 0.34             | 0.12                      |
| left-DLPFC                                                 | 0.02     | 0.03             | 0.9                       |
| right-DLPFC                                                | 0.31     | 0.12             | 0.58                      |

**Table3**

| <b>TABLE 3A Frontolimbic Voxel-wise Healthy &gt; all Bipolar Disorder</b> |          |    |     |               |      |                |                     |            |      |      |           |                     |
|---------------------------------------------------------------------------|----------|----|-----|---------------|------|----------------|---------------------|------------|------|------|-----------|---------------------|
| Region                                                                    | Position |    |     | Cluster-Level |      |                |                     | Peak-Level |      |      |           |                     |
|                                                                           | X        | Y  | Z   | FWE           | FDR  | k <sub>E</sub> | p <sub>uncorr</sub> | FWE        | FDR  | Z    | Cohen's d | p <sub>uncorr</sub> |
| vACC 1                                                                    | 3        | 14 | -8  | 0.15          | 0.53 | 472            | 0.02                | 0.25       | 0.32 | 4.13 | 0.78      | 0.000               |
| vACC 2                                                                    | 9        | 35 | -17 | 0.82          | 0.84 | 108            | 0.24                | 0.74       | 0.54 | 3.68 | 0.69      | 0.000               |
| vACC 3                                                                    | 8        | 44 | -8  | 0.99          | 0.90 | 5              | 0.83                | 0.99       | 0.92 | 3.12 | 0.58      | 0.001               |
| Right-DLPFC                                                               | 51       | 17 | 32  | 0.91          | 0.84 | 70             | 0.34                | 0.81       | 0.60 | 3.61 | 0.68      | 0.000               |
| Left-DLPFC                                                                | -35      | 8  | 36  | 0.61          | 0.80 | 183            | 0.13                | 0.46       | 0.32 | 3.92 | 0.74      | 0.000               |

  

| <b>TABLE 3B Frontolimbic Voxel-wise Full Factorial Main Effect of Suicide Attempt</b> |          |    |    |               |      |                |                     |            |      |      |           |                     |
|---------------------------------------------------------------------------------------|----------|----|----|---------------|------|----------------|---------------------|------------|------|------|-----------|---------------------|
| Region                                                                                | Position |    |    | Cluster-Level |      |                |                     | Peak-Level |      |      |           |                     |
|                                                                                       | X        | Y  | Z  | FWE           | FDR  | k <sub>E</sub> | p <sub>uncorr</sub> | FWE        | FDR  | Z    | Cohen's d | p <sub>uncorr</sub> |
| Right-DLPFC                                                                           | 57       | 23 | 27 | 0.99          | 0.88 | 18             | 0.57                | 0.98       | 0.78 | 3.39 | 0.83      | 0.000               |

  

| <b>TABLE 3C Frontolimbic Suicide Attempt-GMV Predicts Suicidal Ideation</b> |          |    |    |               |       |                |                     |            |       |      |           |                     |
|-----------------------------------------------------------------------------|----------|----|----|---------------|-------|----------------|---------------------|------------|-------|------|-----------|---------------------|
| Region                                                                      | Position |    |    | Cluster-Level |       |                |                     | Peak-Level |       |      |           |                     |
|                                                                             | X        | Y  | Z  | FWE           | FDR   | k <sub>E</sub> | p <sub>uncorr</sub> | FWE        | FDR   | Z    | Cohen's d | p <sub>uncorr</sub> |
| Right DLPFC                                                                 | 57       | 23 | 27 | 0.999         | 0.922 | 9              | 0.704               | 0.996      | 0.744 | 3.31 | 0.815     | 0.000               |

## Figure Legends

### Figure 1.

**Regions of Interest Defined Volumes and ANOVAs.** **A)** vACC region of interest anatomical demarcation (in red shown on the brain volume and in 3-dimensional view), and extracted GMV values from the same region showing differences between healthy > bipolar disorder individuals (left top graph) and how it is more reduced in those no suicide attempt history vs. those with suicide attempt history (right top graph). **B)** Remaining anatomical frontolimbic regions of interest that did not show significant GMV differences for diagnosis and suicide attempt history.

### Figure 2

**Frontolimbic volume-wise diagnostic group GMV differences.** Whole brain group difference of healthy vs bipolar GMV showing reduced volumes selectively localized in the vACC and ventral prefrontal cortex (top left image) and left DLPFC (top right image). The graph shows the extracted GMV values shown to be reduced in bipolar vs healthy in both vACC and DLPFC.

### Figure 3

**Voxel-wise GMV correlates for bipolar disorder suicide attempt history and mood state related.** **A)** shows GMV reductions in right DLPFC of bipolar participants without a history of suicide attempt relative to those with attempt history (i.e. main effect of suicide attempt) with the graph showing the extracted GMV value differences. **B)** the DLPFC region showing altered GMV in bipolar disorder in relation to suicide attempt history was found to correlate positively with/predict suicidal ideation in those with suicide attempt history.

## Supplementary Figure 1

3-Dimensional Frontolimbic Mask used for visualization of all voxel-wise results of wholebrain VBM analysis. Note that the use of this mask does not affect the reported statistics in any way.

### FIGURES

Figure 1

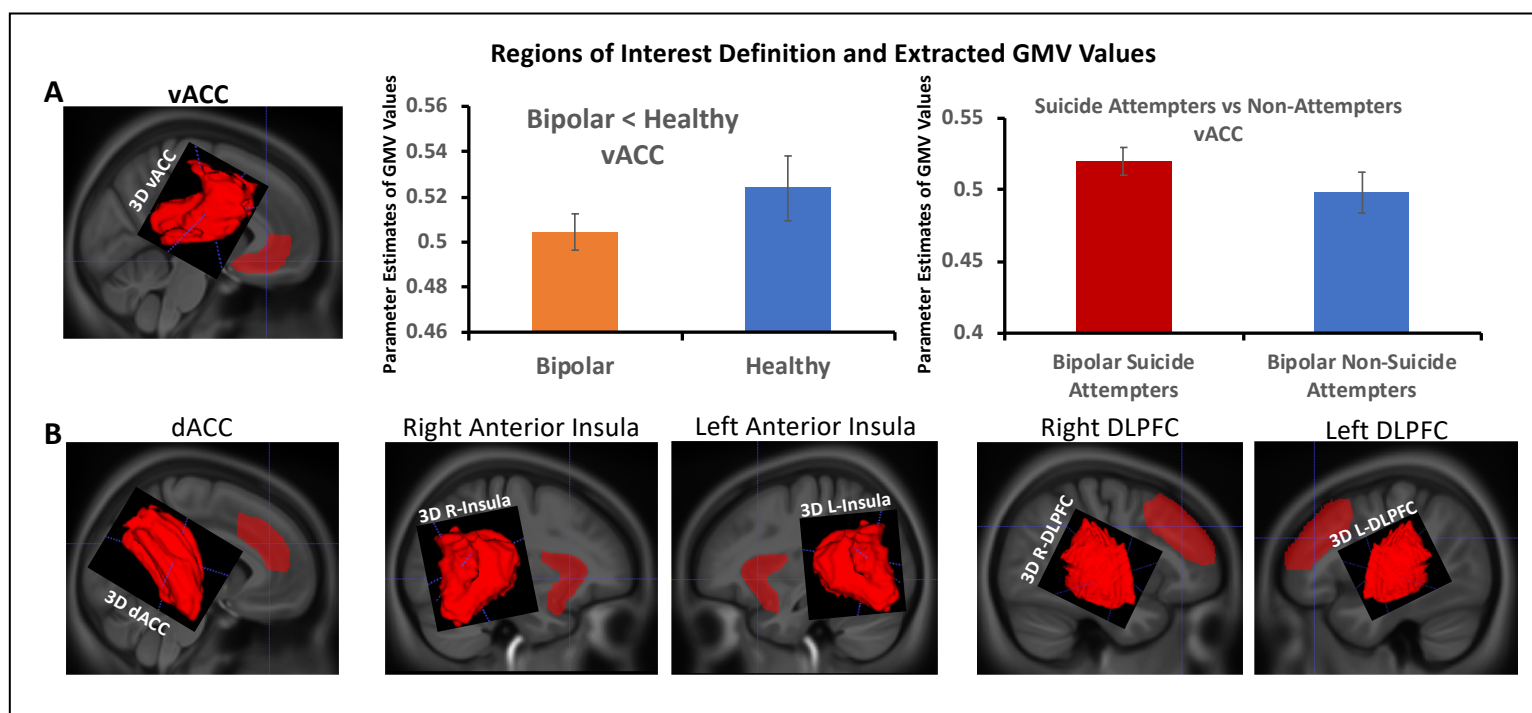

Figure 2

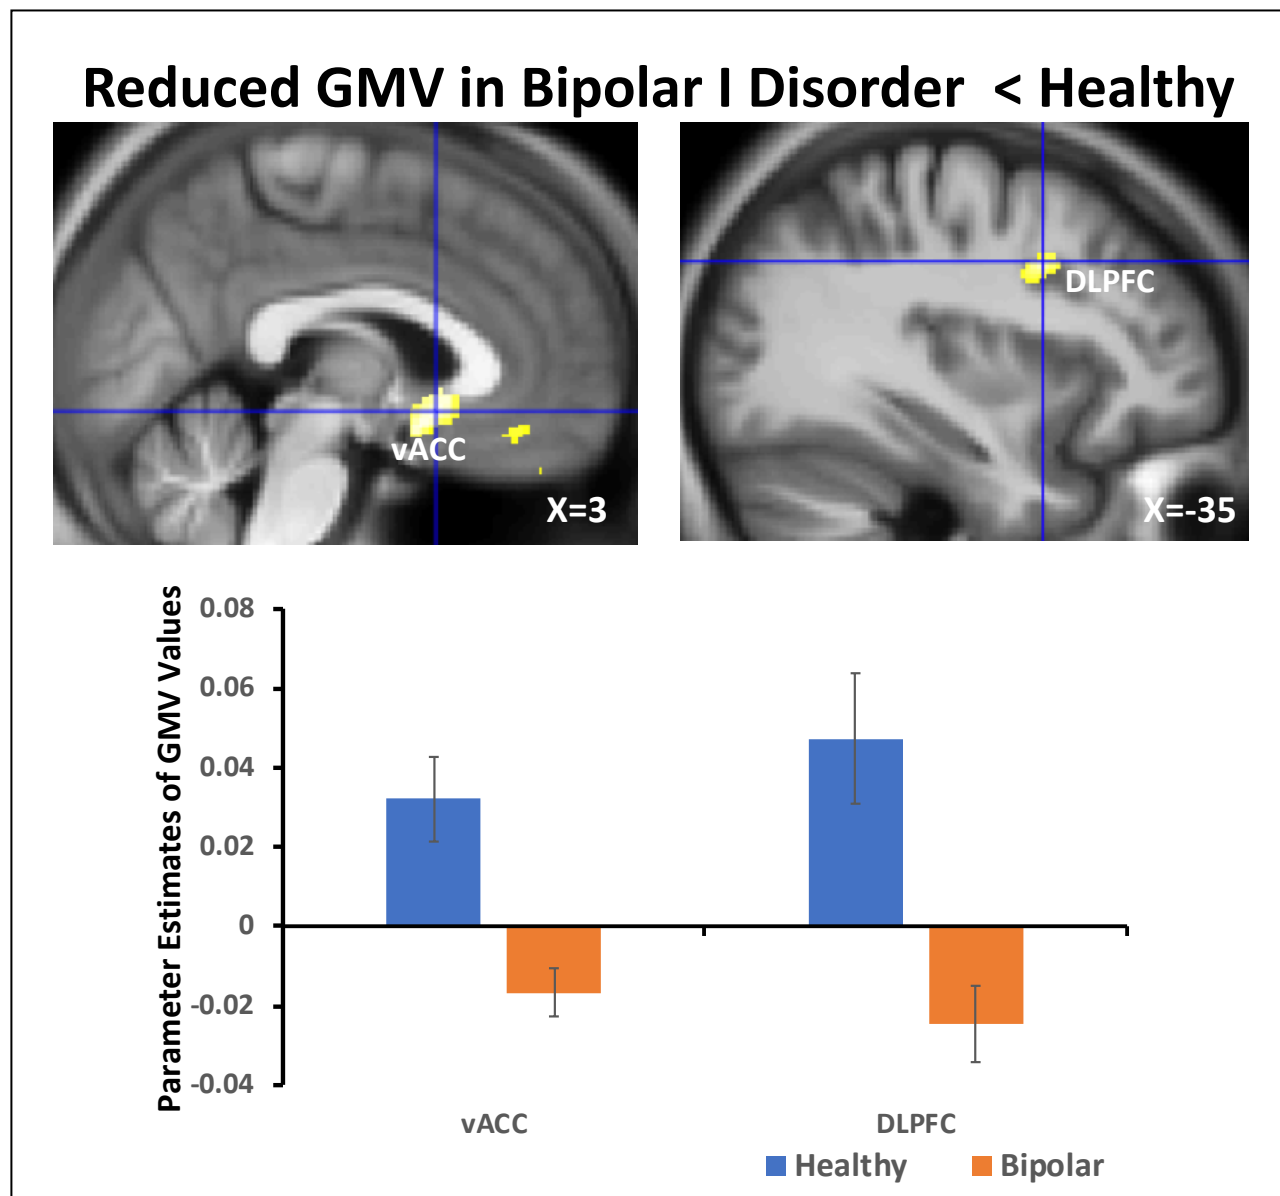

Figure 3

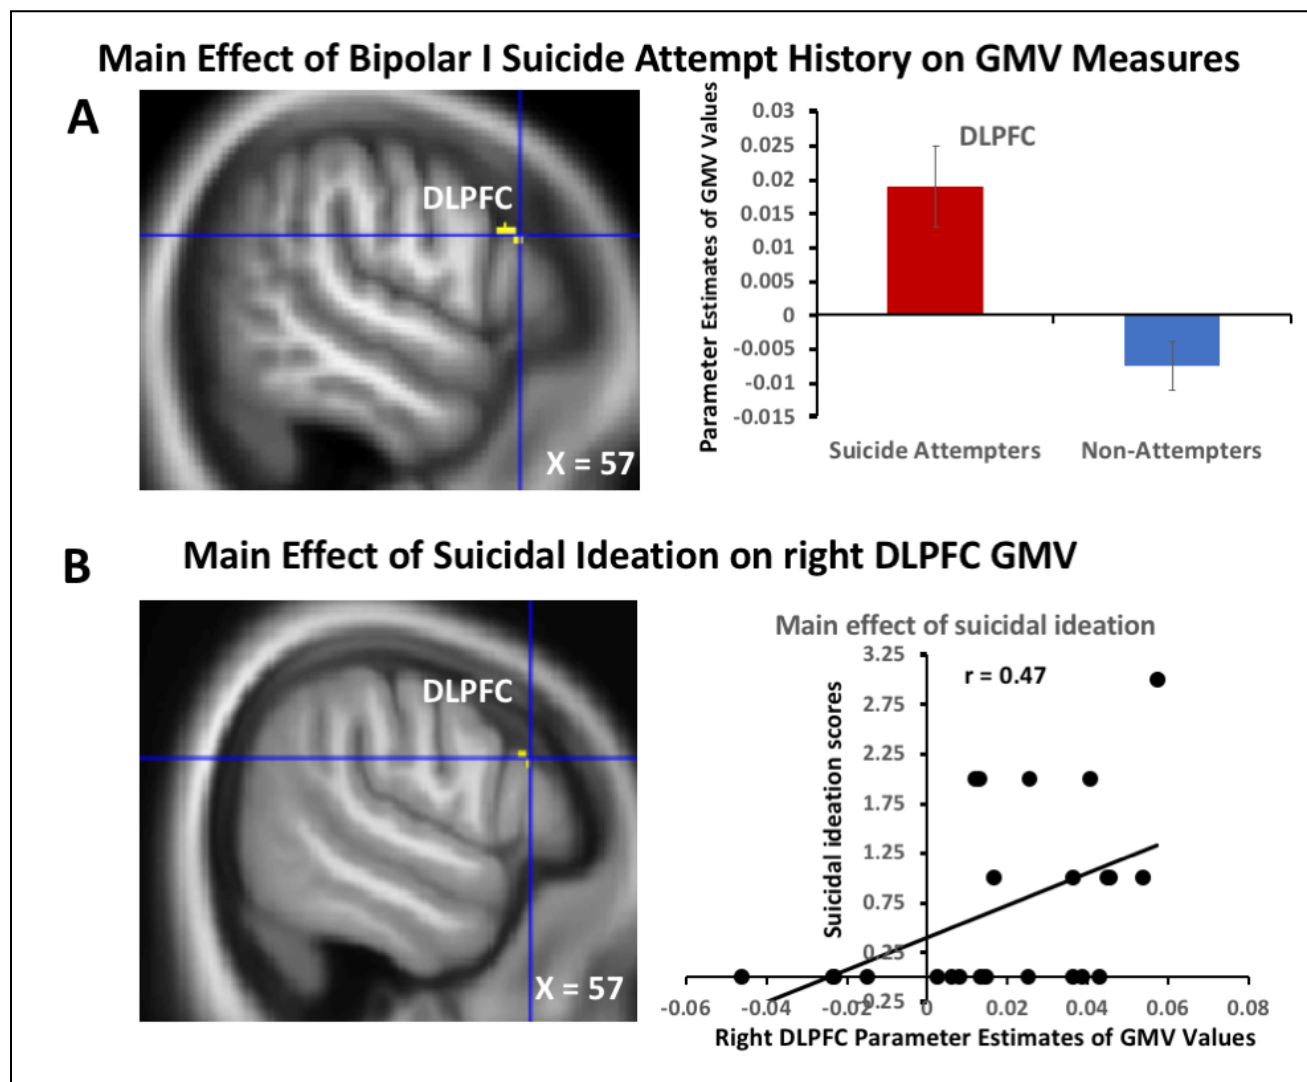



## Supplementary Figure 1

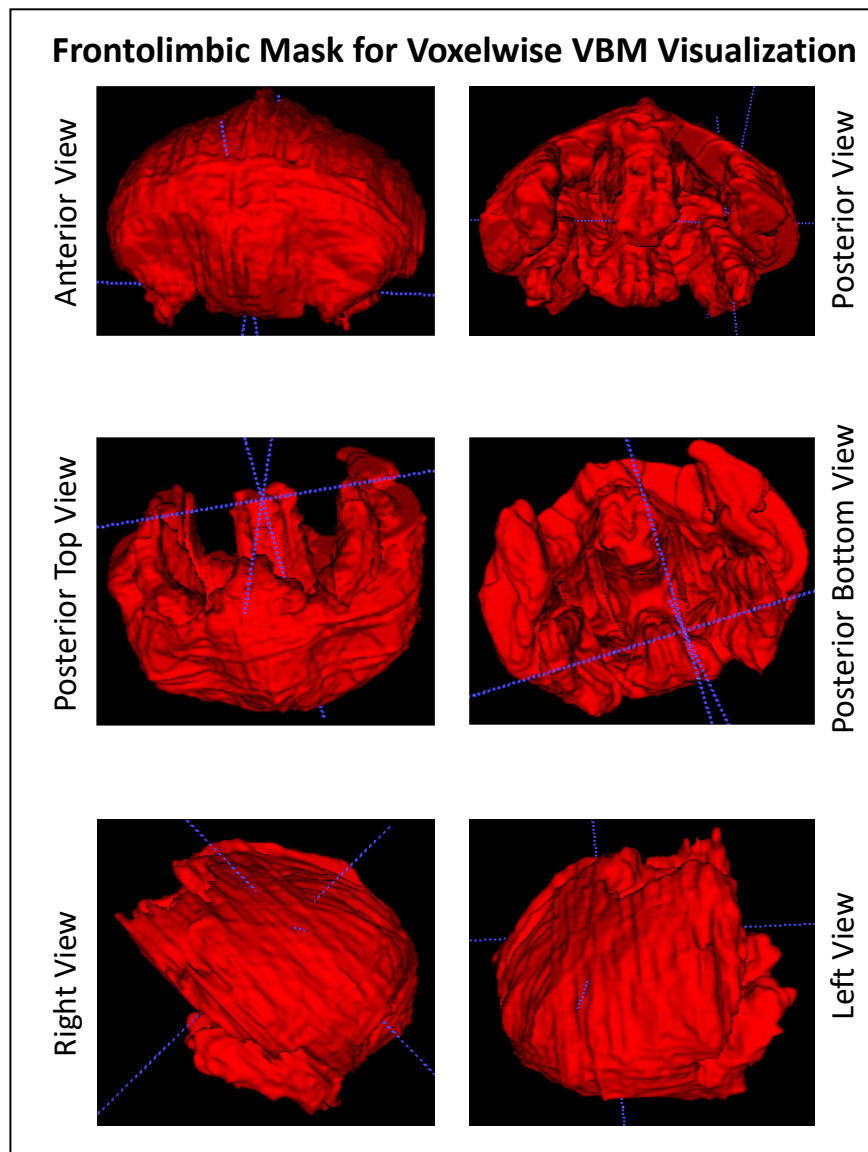

Source: https://medrxiv.org/content/10.1101/2020.05.07.20093245v1.full.pdf
